# Supplementary material
Source: PubMed Central journal article supplement (PMC6345596)

# Supplementary Figure- Uncropped images with size marker indications

Figure 1A

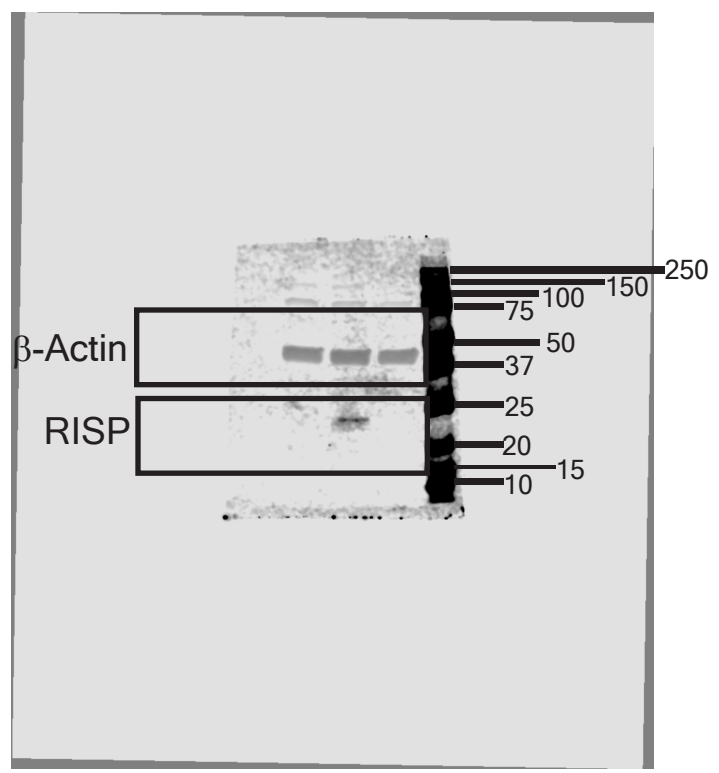

Supplement: NIHMS1514193-supplement-1.pdf [file NIHMS1514193-supplement-1.pdf]
